# Supplementary material
Source: publisher figshare collection journal article supplement (https://acs.figshare.com/ndownloader/files/4029820)
Supplement: Supplementary file 1 [file 4029820]

## **Supporting Information**

# **A time-saving design of experiment protocol for optimization of LC-MS data processing in metabolomic approaches**

### **Abstract**

In supporting information, we describe a detailed protocol for optimization of LC-MS-based metabolomics data processing by using XCMS or any other software (e.g. MZmine), and six tables and four figures are provided for supporting our optimization study.

### **Table of contents**

Page 1. Abstract

Pages 2-5. Protocol of optimization

Page 6. Table S-1

Page 7. Table S-2

Page 8. Table S-3

Page 9. Table S-4

Page 10. Table S-5

Page 11. Table S-6

Page 12. Figure S-1

Page 13. Figure S-2

Page 14. Figure S-3

Page 15. Figure S-4

## Protocol of optimization

### **Materials**

#### *Reagents*

- Deionized (18.2 MΩ ) filtered (0.22 μm) water
- Acetonitrile (LC-MS CHROMASOLV, FLUKA Sigma-Aldrich, cat. no. 34967)

**!CAUTION** Acetonitrile is harmful and volatile and should be handled in a fume hood.

- Acetic acid (LC-MS CHROMASOLV, FLUKA Sigma-Aldrich, cat. no. 49199)

#### *Samples*

- Human urine **#COMMENT** Other samples (e.g. plant and animal tissues, blood plasma and serum, feces, and others) can be used, which depends on your studies.

#### *Equipment*

- Agilent 1200 series capillary HPLC (Agilent, CA, USA) **#COMMENT** Other systems can be used for sample analysis.
- MicrOTOF-Q MS (Bruker Daltonics, Bremen, Germany) **#COMMENT** Other systems can be used for sample analysis.
- ZORBAX 300SB C18 column (0.5 × 150 mm, 3.5 μm, Agilent Technologies, Waldbronn, Germany) **#COMMENT** Other columns can be used for LC separation.
- CompassXport software (Bruker Daltonics, Bremen, Germany) **#COMMENT** Other software can be used for data format transformation.
- R software (v.2.15.2; <http://www.r-project.org/>) **#COMMENT** XCMS software is performed under R environment.
- XCMS software (v.1.34.0; <http://www.bioconductor.org/>) **#COMMENT** Other software can be used and optimized for LC-MS data processing.

- Microsoft Excel (Microsoft Corp., Redmond, WA) **#COMMENT** Other software can be used for correlation analysis.
- SAS 9.2 software (SAS Institute Inc, Cary, NC) **#COMMENT** Other software can be used for design of experiment, such as Design-Expert, MODDE, STATISTICA, and others.

### **Procedure**

- Preparation of dilution series **#COMMENT** Dilute samples with solvent, but the number of dilution series is optional ( $n > 3$ ). In this study, 5 levels were prepared, requiring in total 20 min.
- LC-MS analysis **#COMMENT** 35 min per sample, but it depends on LC-MS methods.
- Screening design **#COMMENT** 1. Choose parameters which you want to optimize and set their ranges for optimization; 2. Determine the responses, which should be a good criteria for evaluating data quality; 3. Screening design (e.g. full factorial, fractional factorial, Plackett-Burman, D-optimal designs and the gradient search based on local main-effect designs). Factors, responses and design methods are optional according to the purpose of the study. In our study, in total 17 parameters were designed to optimize, and default parameters were set as the base level and then the range of parameters increased and decreased from the base level were used for screening design. The reliability index as a response was applied in Plackett-Burman design. A total of 4 h was required.
- XCMS analysis **#COMMENT** Use the parameter setting designed by screening design to analyze LC-MS data and output peak tables. A total of 10 h was required, but this step can be automatic.
- Correlation analysis **#COMMENT** The linearity ( $r$  value) between peak areas from dilution series and the dilution time of samples were calculated by using data analysis in Microsoft

Excel, and then peaks can be graded according to *r values*. Here, peaks with  $r > 0.9$  and  $r < 0.1$  were classified as reliable and unreliable peaks (RP and UP), respectively, and the reliability index was calculated as  $RP^2/UP$ . The threshold of *r value* is optional. A total of 5 h was required.

- Identification of significant parameters **#COMMENT** Model factors and responses with screening designs and identify by ANOVA the factors that significantly affect the response. The significance level is optional, and  $P < 0.05$  was used in our optimization. A total of 1 h was required.
- Optimization design **#COMMENT** Set the range of significant parameters and design experiments for optimizing parameters. Design methods are optional such as central composite, Box-Behnken and D-Optimal designs. In this study, central composite design was used. A total of 30 min was required.
- XCMS analysis **#COMMENT** Use the parameter setting designed by optimization design to analyze LC-MS data and output peak tables. A total of 6 h was required, but this step can be automatic.
- Correlation analysis **#COMMENT** As described above. A total of 1.5 h was required.
- Optimization of significant parameters **#COMMENT** Model significant factors and responses with optimization designs and discover factor values that are needed to achieve a desired response. A total of 1 h was required.
- Calculation of B/S values **#COMMENT** 1. Blank and sample data files were simultaneously processed by XCMS with optimal parameters; 2. The ratio of peak areas of blanks to samples (B/S) was calculated for each peak. A total of 30 min was required.

- Optimization design **#COMMENT** Set the range of B/S and peak intensity and design experiments for optimization. Design methods are optional such as central composite, Box-Behnken and D-Optimal designs. In this study, central composite design was used. A total of 30 min was required.
- Calculation of data quality parameters **#COMMENT** Calculate the reliability index and count the number of peaks under different levels of B/S and peak intensity, and a total of 1.5 h was required.
- Optimization of B/S and peak intensity **#COMMENT** By maximizing the reliability index and minimizing the loss of peaks, the threshold of intensity and B/S was optimized by optimization design. A total of 30 min was required.
- Peaks with higher B/S and lower intensity than their optimal values were removed from data sets. **#COMMENT** Optimized peak tables for further analysis (e.g. PCA, PLS-DA, OPLS-DA, and others).

**Table S-1.** List of chemicals used in this study.

| Chemical               | Purity (%) | Source        | Chemical            | Purity (%) | Source                                            |
|------------------------|------------|---------------|---------------------|------------|---------------------------------------------------|
| (-)-Epicatechin        | ≥90        | Sigma         | L-Histidine         | ≥99        | Sigma-Aldrich                                     |
| Inosine                | ≥99        | Sigma         | L-Leucine           | ≥98        | Sigma                                             |
| 2-Hydroxycinnamic acid | 97         | Aldrich       | L-Lysine            | ≥98        | Sigma                                             |
| 2-Oxoglutaric acid     | ≥99.0      | Fluka         | L-Methionine        | ≥98        | Sigma-Aldrich                                     |
| 2-Aminobutyric acid    | ≥99.0      | Fluka         | L-Proline           | ≥99        | Sigma-Aldrich                                     |
| Allantoin              | ≥98        | Sigma         | L-Rhamnose          | ≥99        | Sigma                                             |
| Catechin               | ≥98        | Sigma         | L-Serine            | ≥99        | Sigma                                             |
| D-(-)-Fructose         | ≥99        | Sigma         | L-Threonine         | ≥98        | Sigma-Aldrich                                     |
| D-(+)-Galactose        | ≥99        | Sigma-Aldrich | L-Tryptophan        | ≥98        | Sigma-Aldrich                                     |
| δ-Gluconolactone       | ≥99.0      | Sigma         | L-Tyrosine          | ≥98        | Sigma-Aldrich                                     |
| D-(+)-Glucose          | ≥99.5      | Sigma         | L-Valine            | ≥98        | Sigma-Aldrich                                     |
| D-(+)-Xylose           | ≥99        | Sigma-Aldrich | L-Phenylalanine     | ≥98        | Sigma-Aldrich                                     |
| D-Glucurone            | ≥99        | Sigma         | Maltose             | ≥99        | Sigma-Aldrich                                     |
| D-Glucuronic acid      | ≥99.5      | Sigma         | Maltotriose         | ≥95        | Sigma                                             |
| DL-Malic acid          | ≥99        | Aldrich       | Mannose             | ≥99        | Sigma                                             |
| D-Mannitol             | ≥98        | Sigma-Aldrich | Myo-Inositol        | ≥99        | Sigma                                             |
| Dulcitol               | ≥99        | Sigma         | Protocatechuic acid | 97         | Aldrich                                           |
| Fumaric acid           | ≥99        | Aldrich       | Salicylic acid      | ≥99        | Aldrich                                           |
| Guanosine              | ≥98        | Sigma         | Sorbitol            | ≥98        | Sigma                                             |
| L-(+)-Arabinose        | ≥99        | Sigma         | Sucrose             | ≥99.5      | Sigma                                             |
| L-Alanine              | ≥98        | Sigma         | Syringic acid       | ≥95        | Sigma                                             |
| L-Arginine             | ≥98        | Sigma-Aldrich | Umbelliferone       | 99         | Aldrich                                           |
| L-Asparagine           | ≥98        | Sigma         | Uracil              | ≥99.0      | Fluka                                             |
| L-Cysteine             | 97         | Aldrich       | Uridine             | ≥99        | Fluka                                             |
| L-Glutamine            | ≥99        | Sigma         | Naringin            | ≥95        | Spectrum<br>Chemicals &<br>Laboratory<br>Products |

**Table S-2.** The correlation of reliable peaks (RP) <sup>a</sup>, unreliable peaks (UP) <sup>b</sup>, total peaks (TP) and related parameters.

|                     | RP    | UP    | TP    | RP/TP | UP/TP | RP/UP |
|---------------------|-------|-------|-------|-------|-------|-------|
| UP                  | 0.88  |       |       |       |       |       |
| TP                  | 0.93  | 0.99  |       |       |       |       |
| RP/TP               | -0.61 | -0.77 | -0.77 |       |       |       |
| UP/TP               | 0.45  | 0.69  | 0.63  | -0.82 |       |       |
| RP/UP               | -0.51 | -0.67 | -0.65 | 0.92  | -0.93 |       |
| RP <sup>2</sup> /UP | 0.58  | 0.19  | 0.30  | 0.14  | -0.38 | 0.28  |

<sup>a</sup> The peak with a high correlation ( $r > 0.9$ ) between peak area and concentration of dilution series; <sup>b</sup> The peak with a low correlation ( $r < 0.1$ ) between peak area and concentration of dilution series.

**Table S-3.** The default and Plackett-Burman design parameters of XCMS software.

| Parameters                           | Default   | Design I           | Design II          |
|--------------------------------------|-----------|--------------------|--------------------|
| Filter and Identify Peaks – centWave |           |                    |                    |
| ppm                                  | 25        | 5→25               | 25→100             |
| peakwidth_min                        | 20        | 5→20               | 20→45              |
| peakwidth_max                        | 50        | 25→50              | 50→100             |
| snthresh                             | 10        | 1→10               | 10→50              |
| prefilter_k                          | 3         | 1→3                | 3→10               |
| prefilter_l                          | 100       | 5→100              | 100→500            |
| mzCenterFun                          | wMean     | wMean→wMeanApex3   | wMean→apex         |
| integrate                            | 1         | 1→2                | 1→2                |
| mzdiff                               | -0.001    | -0.01→-0.001       | -0.001→-0.0001     |
| fitguass                             | FALSE     | FALSE→TRUE         | FALSE→TRUE         |
| Match Peaks Across Samples           |           |                    |                    |
| bw                                   | 30        | 5→30               | 30→100             |
| minfrac                              | 0.5       | 0.1→0.5            | 0.5→1.0            |
| mzwid                                | 0.25      | 0.05→0.25          | 0.25→1.0           |
| max                                  | 50        | 5→50               | 50→100             |
| Retention Time Correction            |           |                    |                    |
| smooth                               | linear    | linear→loess       | linear→loess       |
| span                                 | 0.2       | 0.05→0.2           | 0.2→1.0            |
| family                               | symmetric | symmetric→gaussian | symmetric→gaussian |



**Table S-4.** Plackett-Burman design of XCMS optimization.

| Run | X1 <sup>a</sup> | X2              | X3 | X4 | X5 | X6 | X7 | X8 | X9 | X10 | X11 | X12 | X13 | X14 | X15 | X16 | X17 |
|-----|-----------------|-----------------|----|----|----|----|----|----|----|-----|-----|-----|-----|-----|-----|-----|-----|
| 1   | 1 <sup>b</sup>  | -1 <sup>c</sup> | 1  | 1  | -1 | -1 | -1 | -1 | 1  | -1  | 1   | -1  | 1   | 1   | 1   | 1   | -1  |
| 2   | 1               | 1               | -1 | 1  | 1  | -1 | -1 | -1 | -1 | 1   | -1  | 1   | -1  | 1   | 1   | 1   | 1   |
| 3   | -1              | 1               | 1  | -1 | 1  | 1  | -1 | -1 | -1 | -1  | 1   | -1  | 1   | -1  | 1   | 1   | 1   |
| 4   | -1              | -1              | 1  | 1  | -1 | 1  | 1  | -1 | -1 | -1  | -1  | 1   | -1  | 1   | -1  | 1   | 1   |
| 5   | 1               | -1              | -1 | 1  | 1  | -1 | 1  | 1  | -1 | -1  | -1  | -1  | 1   | -1  | 1   | -1  | 1   |
| 6   | 1               | 1               | -1 | -1 | 1  | 1  | -1 | 1  | 1  | -1  | -1  | -1  | -1  | 1   | -1  | 1   | -1  |
| 7   | 1               | 1               | 1  | -1 | -1 | 1  | 1  | -1 | 1  | 1   | -1  | -1  | -1  | -1  | 1   | -1  | 1   |
| 8   | 1               | 1               | 1  | 1  | -1 | -1 | 1  | 1  | -1 | 1   | 1   | -1  | -1  | -1  | -1  | 1   | -1  |
| 9   | -1              | 1               | 1  | 1  | 1  | -1 | -1 | 1  | 1  | -1  | 1   | 1   | -1  | -1  | -1  | -1  | 1   |
| 10  | 1               | -1              | 1  | 1  | 1  | 1  | -1 | -1 | 1  | 1   | -1  | 1   | 1   | -1  | -1  | -1  | -1  |
| 11  | -1              | 1               | -1 | 1  | 1  | 1  | 1  | -1 | -1 | 1   | 1   | -1  | 1   | 1   | -1  | -1  | -1  |
| 12  | 1               | -1              | 1  | -1 | 1  | 1  | 1  | 1  | -1 | -1  | 1   | 1   | -1  | 1   | 1   | -1  | -1  |
| 13  | -1              | 1               | -1 | 1  | -1 | 1  | 1  | 1  | 1  | -1  | -1  | 1   | 1   | -1  | 1   | 1   | -1  |
| 14  | -1              | -1              | 1  | -1 | 1  | -1 | 1  | 1  | 1  | 1   | -1  | -1  | 1   | 1   | -1  | 1   | 1   |
| 15  | -1              | -1              | -1 | 1  | -1 | 1  | -1 | 1  | 1  | 1   | 1   | -1  | -1  | 1   | 1   | -1  | 1   |
| 16  | -1              | -1              | -1 | -1 | 1  | -1 | 1  | -1 | 1  | 1   | 1   | 1   | -1  | -1  | 1   | 1   | -1  |
| 17  | 1               | -1              | -1 | -1 | -1 | 1  | -1 | 1  | -1 | 1   | 1   | 1   | 1   | -1  | -1  | 1   | 1   |
| 18  | 1               | 1               | -1 | -1 | -1 | -1 | 1  | -1 | 1  | -1  | 1   | 1   | 1   | 1   | -1  | -1  | 1   |
| 19  | -1              | 1               | 1  | -1 | -1 | -1 | -1 | 1  | -1 | 1   | -1  | 1   | 1   | 1   | 1   | -1  | -1  |
| 20  | -1              | -1              | -1 | -1 | -1 | -1 | -1 | -1 | -1 | -1  | -1  | -1  | -1  | -1  | -1  | -1  | -1  |

<sup>a</sup> X1, ppm; X2, peakwidth\_min; X3, peakwidth\_max; X4, snthresh; X5, prefilter\_k; X6, prefilter\_l; X7, mzCenterFun; X8, integrate; X9, mzdiff; X10, fitguass; X11, bw; X12, minfrac; X13, mzwid; X14, max; X15, smooth; X16, span; X17, family; <sup>b</sup> default parameters; <sup>c</sup> designed parameters.

**Table S-5.** Optimal XCMS settings and threshold values of synthetic and urine samples.

| Parameters                           | Optimal setting of<br>synthetic sample | Optimal setting of urine<br>sample |              |              |
|--------------------------------------|----------------------------------------|------------------------------------|--------------|--------------|
| Filter and Identify Peaks – centWave |                                        |                                    |              |              |
| ppm                                  | 25                                     | 25                                 |              |              |
| peakwidth_min                        | 20                                     | 20                                 |              |              |
| peakwidth_max                        | 82.5                                   | 50                                 |              |              |
| snthresh                             | 10                                     | 10                                 |              |              |
| prefilter_k                          | 3                                      | 3                                  |              |              |
| prefilter_l                          | 100                                    | 100                                |              |              |
| mzCenterFun                          | wMean                                  | wMean                              |              |              |
| integrate                            | 1                                      | 1                                  |              |              |
| mzdiff                               | -0.001                                 | -0.001                             |              |              |
| fitguass                             | FALSE                                  | FALSE                              |              |              |
| Match Peaks Across Samples           |                                        |                                    |              |              |
| bw                                   | 8.25                                   | 8.25                               |              |              |
| minfrac                              | 0.5                                    | 0.39                               |              |              |
| mzwid                                | 0.25                                   | 0.25                               |              |              |
| max                                  | 50                                     | 50                                 |              |              |
| Retention Time Correction            |                                        |                                    |              |              |
| smooth                               | loess                                  | loess                              |              |              |
| span                                 | 0.2                                    | 0.2                                |              |              |
| family                               | gaussian                               | gaussian                           |              |              |
| Threshold Values                     |                                        |                                    |              |              |
|                                      | Default XCMS                           | Optimal XCMS                       | Default XCMS | Optimal XCMS |
| B/S                                  | 0.75                                   | 0.25                               | 0.25         | 0.25         |
| Intensity                            | 3250                                   | 3250                               | 7750         | 7750         |

**Table S-6.** Results of synthetic samples analyzed by different methods.

|                                |                | Reliability | Group | Reliable | Unreliable     | Total | Identified              |
|--------------------------------|----------------|-------------|-------|----------|----------------|-------|-------------------------|
|                                |                | index       | index | peaks    | peaks          | peaks | percentage <sup>a</sup> |
| Default Setting                |                | 735.0       | 44.3  | 443      | 267            | 883   | 14.0                    |
| Threshold Method               | P <sup>b</sup> | 4782.9      | 52.5  | 305      | - <sup>d</sup> | 429   | -                       |
|                                | V <sup>c</sup> | 3513.5      | 54.9  | 308      | 27             | 386   | 26.2                    |
| Optimal Setting                | P              | 948.5       | 50.3  | -        | -              | -     | -                       |
|                                | V              | 877.4       | 53.4  | 493      | 277            | 964   | 16.6                    |
| Optimal+Threshold <sup>e</sup> | P              | 12400.5     | 69.5  | 330      | -              | 409   | -                       |
|                                | V              | 6960.9      | 68.6  | 344      | 17             | 407   | 35.9                    |

<sup>a</sup> The percentage of identified peaks in total peaks; <sup>b</sup> Prediction of CCD models; <sup>c</sup> Validation of CCD models; <sup>d</sup> Non-prediction; <sup>e</sup> The approach combining optimal parameter setting and threshold method.

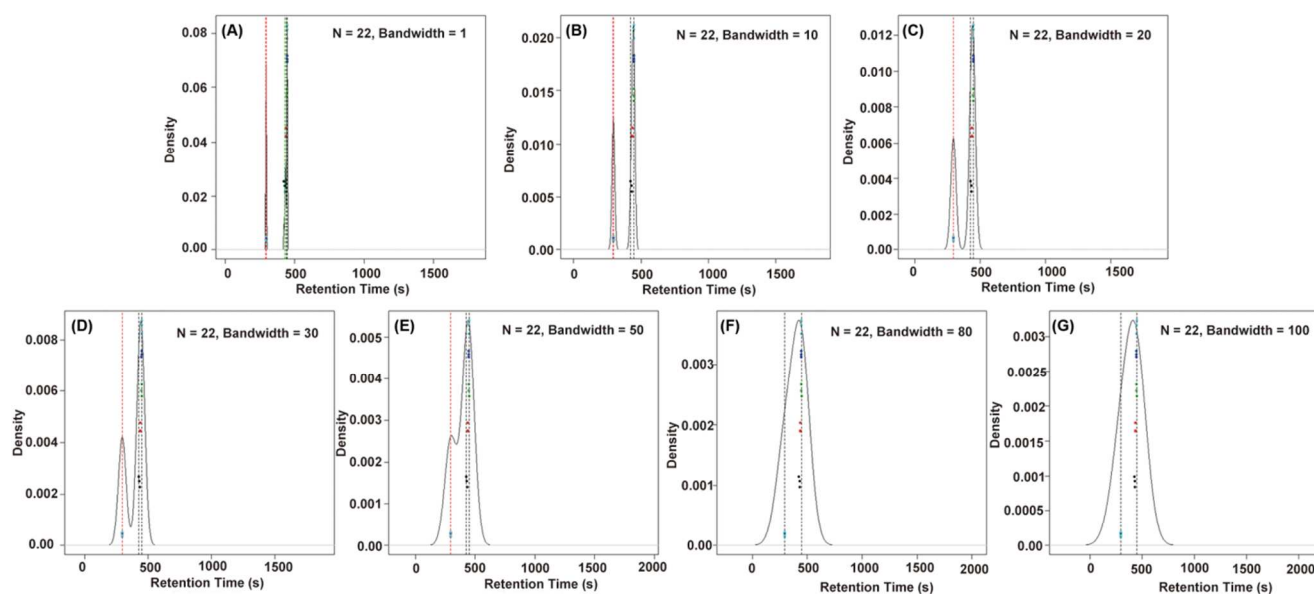

**Figure S-1.** Effect of parameter 'bw' on the peaks group during XCMS processing: A, bw = 1; B, bw = 10; C, bw = 20; D, bw = 30; E, bw = 50; F, bw = 80; G, bw = 100.

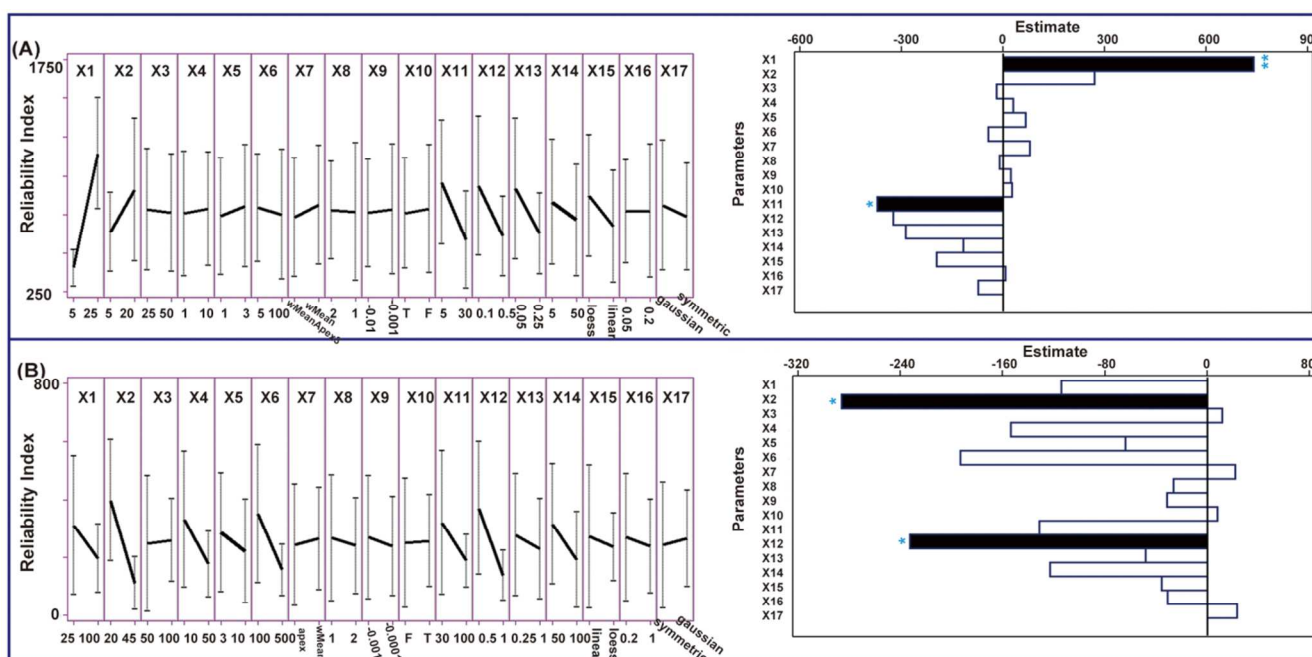

**Figure S-2.** The main effect and regression coefficient of 17 parameters in Plackett-Burman design (A, Design I; B, Design II): X1, ppm; X2, peakwidth\_min; X3, peakwidth\_max; X4, snthresh; X5, prefilter\_k; X6, prefilter\_l; X7, mzCenterFun; X8, integrate; X9, mzdiff; X10, fitguass; X11, bw; X12, minfrac; X13, mzwid; X14, max; X15, smooth; X16, span; X17, family. The black bars represent significant parameters selected by ANOVA (\*,  $P < 0.05$ ; \*\*,  $P < 0.01$ ).

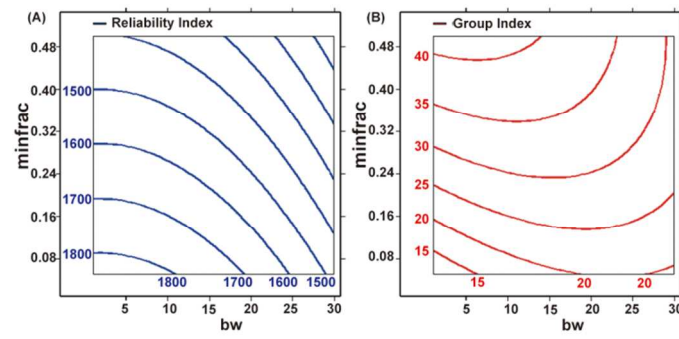

**Figure S-3.** The effect of 'bw' and 'minfrac' on reliability index (A) and group index (B).

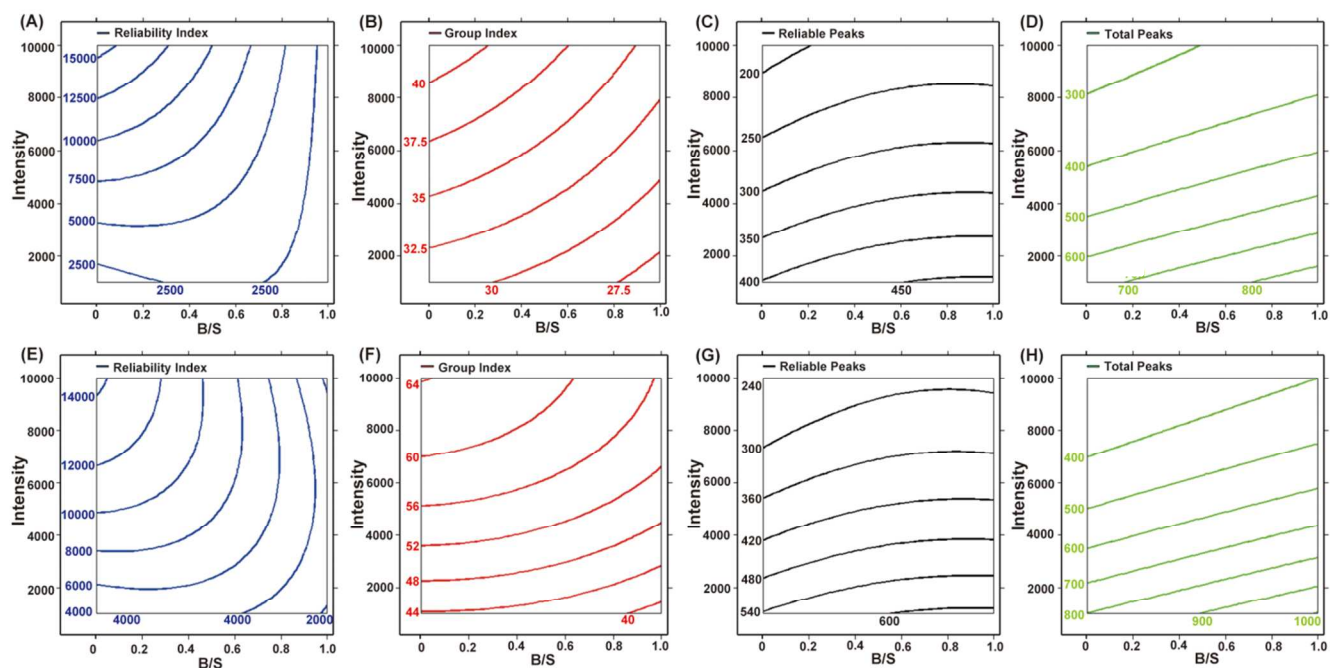

**Figure S-4.** The effect of peak intensity and B/S value on reliability index, group index, reliable peaks and total peaks in the peaks table produced by XCMS with default (A, B, C and D) and optimal (E, F, G and H) settings.
